# Supplementary material
Source: publisher site journal article supplement (https://www.dovepress.com/article/442906)
Supplement: Supplementary file 1 [file get_supplementary_file.php]

**Appendix Input Data and Sources**

| **Table S1. Complement Inhibitors - Drug Prices** | | | | |  |
| --- | --- | --- | --- | --- | --- |
| **Generic Name** | **Brand Name** | **Dose Form** | **Strength/Unit (mg)** | **Pack Price (€)** |  |
| Pegcetacoplan | Aspaveli | SC | 1080 | 2.802,96 € |  |
| Eculizumab | Soliris | IV | 300 | 4.151,50 € |  |
| Ravulizumab | Ultomiris | IV | 300 | 4.528,91 € |  |

**Note**: Data from Colden et al.1

| **Table S2. Complement Inhibitors - Dosing Regimens** | | | | | | | | | | |
| --- | --- | --- | --- | --- | --- | --- | --- | --- | --- | --- |
|  |  | |  |  | | |  | |  | |
| **Pegcetacoplan** | Treatment-switch patients | | | 4-week run-in period: 1,080 mg pegcetacoplan twice weekly + current dose of C5 inhibitor | | | | | | |
| Maintenance period: 1,080 mg APL-2 SC administration twice weekly | | | | | | |
| Treatment-naïve patients | | | 1,080 mg APL-2 SC administration twice weekly | | | | | | |
| **Eculizumab** | Treatment-switch patients | | | 900 mg IV infusion every 14 ± 2 days | | | | | | |
| Treatment-naïve patients | | | Loading: 600 mg IV infusion every week for the first 4 weeks | | | | | | |
| Maintenance: 900 mg for the fifth week, followed by 900 mg IV infusion every 14 ± 2 days | | | | | | |
| **Ravulizumab** | Weight-based dosing | | | Body weight range | | | Loading dose (mg) | | Maint. dose (mg) | |
| ≥40 to <60 | | | 2.400 | | 3.000 | |
| ≥60 to <100 | | | 2.700 | | 3.300 | |
| ≥100 | | | 3.000 | | 3.600 | |
| Loading dose | | | Weight-based IV infusion | | | | | | |
| *For treatment-switch patients, administer ravulizumab 2 weeks after last dose of eculizumab | | | | | | |
|  | |  |
| Maintenance dose | | | Weight-based IV infusion every 8 weeks starting 2 weeks after the loading dose | | | | | | |
|  | |  |
| **Note:** Data from Merck & Co. MSD manuals professional edition. S.d.2  **Table S3. BSC Treatments - Drug Prices** | | | | | | | | | | | |
| **Treatment** | | **Drug Name** | | | **Price/mg** | **Dosing Regimen** | | **Costs Per Cycle** | | **Treat. Usage (%)** | |
| Anticoagulation | | Warfarin | | | 0,016 € | 3-9 mg daily (assuming 6mg) | | 2,710 € | | 58,00% | |
|  | |
| Ciclosporin | | Ciclosporin | | | 0,011 € | 6mg/kg daily | | 132,842 € | | 14,00% | |
| Androgens | | Danazol | | | 0,002 € | 100 mg orally twice daily | | 11,499 € | | 3,00% | |

**Note**: Data from Hill et al.3

| **Table S4. Supportive Treatments** | | | | |  |
| --- | --- | --- | --- | --- | --- |
| **Treatment** | **Drug Name** | **Price/mg** | **Dosing Regimen** | **Costs Per Cycle** |  |
| Corticosteroids/immunosuppressants | Prednisone | 0,014 € | 5 mg once daily | 1,90 € |  |
| Prophylactic antibiotics | Ciproxin | 0,003 € | 500 mg daily 14 days | 21,373 € |  |
|  |

**Note**: Data from Colden et al.1

| **Table S5. Other Resource Use Cost** | |  |  |  |  |
| --- | --- | --- | --- | --- | --- |
|  | **Unit Cost** |  |  |  |  |
| GP visit | 15,58 € |  |  |  |  |
| Hematologist | 20,66 € |  |  |  |  |
| Oncologist | 20,66 € |  |  |  |  |
| Blood test | 91,29 € |  |  |  |  |

**Note**: Data from Colden et al.1

| **Table S6. Adverse Events Costs** |  |  |  |  |  |
| --- | --- | --- | --- | --- | --- |
|  | **Unit Cost**  **Per Event** |  |  |  |  |
| Anemia | 1.676,00 € |  |  |  |  |
| Hemolytic anemia | 3.738,00 € |  |  |  |  |
| Bacterial infection | 3.508,00 € |  |  |  |  |
| Gastroenteritis | 959,00 € |  |  |  |  |
| Atrial fibrillation | 974,00 € |  |  |  |  |
| Hyperthermia | 282,00 € |  |  |  |  |
| Facial paralysis | 1.210,00 € |  |  |  |  |
| Dyspnoea | 1.484,00 € |  |  |  |  |
| Abdominal pain | 959,00 € |  |  |  |  |
| Biliary colic | 1.171,00 € |  |  |  |  |
| Hepatocellular injury | 1.407,00 € |  |  |  |  |
| Hyperbilirubinemia | 1.171,00 € |  |  |  |  |
| Jaundice | 1.407,00 € |  |  |  |  |

**Note**: Data from Colden et al.1

| **Table S7. Final results – summary post-introduction of biosimilar of eculizumab** | | | | |
| --- | --- | --- | --- | --- |
|  |  |  | **Incremental Costs/QALYs** | |
| **Results Summary** | **Pegcetacoplan** | **Eculizumab** | | **Pegcetacoplan vs.**  **Eculizumab** |
| Total discounted costs (€) | 1.468.470 | 1.537.180 | | -68.709 |
| Total discounted QALYs | 3,313 | 2,803 | | 0,510 |
| **Incremental cost per QALY gained (€/QALY gained)** | | | | **Dominant** |

**Note**: Data from Colden et al.1
